# Supplementary material for: Development of an AlphaLISA high throughput technique to screen for small molecule inhibitors targeting protein arginine methyltransferases
Source: Royal Society of Chemistry journal article supplement (doi:10.1039/c7mb00391a), 2017-10-25
Supplement: c7mb00391a1.pdf [file c7mb00391a1.pdf]

Prabhu *et al.*

## Supplementary Information

### Supplementary Table 1.

Comparison of ranges of IC50s of P1608K04, P1618J22 with Commercial inhibitor EPZ015666

| Cancer Type | Inhibitors we identified |                   | Commercial inhibitor <sup>1</sup> |
|-------------|--------------------------|-------------------|-----------------------------------|
|             | P1608K04, $\mu$ M        | P1618J22, $\mu$ M | EPZ015666, $\mu$ M                |
| PDAC        | 8.5 - 20                 | 21 - 50           | 50 - 95                           |
| CRC         | 3-12                     | 25 - 38           | 180 - 195                         |

#### Reference:

1. L. Prabhu, H. Wei, L. Chen, Ö. Demir, G. Sandusky, E. Sun, J. Wang, J. Mo, L. Zeng, M. Fishel, A. Safa, R. Amaro, M. Korc, Z-Y. Zhang and T. Lu. *Oncotarget*, 2017, **8**, 39963-39977.
